# Supplementary material for: Evolutionary and functional analysis of the plant-specific NADPH oxidase gene family in Brassica rapa L
Source: R Soc Open Sci. 2019 Feb 27;6(2):181727. doi: 10.1098/rsos.181727 (PMC6408365; doi:10.1098/rsos.181727)
Supplement: Table S2 [file rsos181727supp7.xlsx]

## Sheet: Sheet1
Table S2. Ka/Ks analysis for the gene pairs with collinearity relationship.
Gene Pairs	Ks	Ka	Ka/Ks	Purifying selection	Duplication Type
AtRBOH03-AtRBOH05	2.143	0.29308	0.137	Yes	Segmental
AtRBOH04-AtRBOH10	0.93256	0.10433	0.112	Yes	Segmental
AtRBOH06-AtRBOH09	1.04515	0.16731	0.16	Yes	Segmental
BrRBOH01-BrRBOH06	1.5208	0.3837	0.252	Yes	Segmental
BrRBOH02-BrRBOH09	0.8936	0.1156	129	Yes	Segmental
BrRBOH04-BrRBOH10	1.78754	1.01175	0.566	Yes	Segmental
BrRBOH05-BrRBOH14	0.4402	0.206	0.468	Yes	Segmental
BrRBOH13-BrRBOH14	2.9065	0.3499	0.12	Yes	Segmental
GmRBOH02-GmRBOH16	0.12531	0.0088	0.07	Yes	Segmental
GmRBOH03-GmRBOH07	0.15035	0.02216	0.147	Yes	Segmental
GmRBOH04-GmRBOH15	0.10791	0.02462	0.228	Yes	Segmental
GmRBOH05-GmRBOH09	0.08934	0.01356	0.152	Yes	Segmental
GmRBOH10-GmRBOH06	0.08573	0.01343	0.157	Yes	Segmental
GmRBOH11-GmRBOH14	0.15381	0.0115	0.075	Yes	Segmental
GmRBOH12-GmRBOH17	0.17108	0.00685	0.04	Yes	Segmental
GmRBOH13-GmRBOH01	0.10651	0.01322	0.124	Yes	Segmental
PpRBOH01-PpRBOH03	0.75185	0.11875	0.158	Yes	Segmental
PpRBOH05-PpRBOH04	0.78304	0.17411	0.222	Yes	Segmental
PtRBOH01-PtRBOH04	0.27056	0.05089	0.188	Yes	Segmental
PtRBOH02-PtRBOH03	0.25469	0.0334	0.131	Yes	Segmental
PtRBOH06-PtRBOH10	0.23929	0.06263	0.262	Yes	Segmental
PtRBOH08-PtRBOH09	0.27766	0.03834	0.138	Yes	Segmental
SmRBOH01-SmRBOH04	0.01392	0.00236	0.17	Yes	Segmental
SmRBOH02-SmRBOH05	2.07626	0.24744	0.119	Yes	Segmental
ZmRBOH05-ZmRBOH14	0.29202	0.02272	0.078	Yes	Segmental
BrRBOH01-AtRBOH06	1.2084	0.4487	0.371	Yes	Segmental
BrRBOH01-AtRBOH09	1.3795	0.4128	0.299	Yes	Segmental
BrRBOH02-AtRBOH04	0.9746	0.1141	0.117	Yes	Segmental
BrRBOH02-AtRBOH10	0.43173	0.04254	0.099	Yes	Segmental
BrRBOH03-AtRBOH05	0.50653	0.10897	0.215	Yes	Segmental
BrRBOH04-AtRBOH08	0.63559	0.05936	0.093	Yes	Segmental
BrRBOH05-AtRBOH07	0.4779	0.2099	0.439	Yes	Segmental
BrRBOH06-AtRBOH06	2.1413	0.2943	0.137	Yes	Segmental
BrRBOH06-AtRBOH09	0.50533	0.05232	0.104	Yes	Segmental
BrRBOH08-AtRBOH02	1.798	1.584	0.881	Yes	Segmental
BrRBOH09-AtRBOH10	0.9521	0.116	0.122	Yes	Segmental
BrRBOH10-AtRBOH08	0.60232	0.05789	0.096	Yes	Segmental
BrRBOH11-AtRBOH03	0.47308	0.03147	0.067	Yes	Segmental
BrRBOH13-AtRBOH01	0.45557	0.07767	0.17	Yes	Segmental
BrRBOH14-AtRBOH07	0.43285	0.0868	0.201	Yes	Segmental
BrRBOH01-GmRBOH03	0.8044	0.4329	0.538	Yes	Segmental
BrRBOH01-GmRBOH07	0.8059	0.4226	0.524	Yes	Segmental
BrRBOH01-GmRBOH09	0.7616	0.4551	0.596	Yes	Segmental
BrRBOH06-GmRBOH03	1.0728	0.3031	0.283	Yes	Segmental
BrRBOH06-GmRBOH07	1.4001	0.3003	0.214	Yes	Segmental
BrRBOH06-GmRBOH09	0.7529	0.2381	0.316	Yes	Segmental
BrRBOH06-GmRBOH14	0.7823	0.3896	0.532	Yes	Segmental
BrRBOH11-GmRBOH01	0.7348	0.1412	0.192	Yes	Segmental
BrRBOH11-GmRBOH06	0.7072	0.1393	0.197	Yes	Segmental
BrRBOH11-GmRBOH10	1.1748	0.1542	0.131	Yes	Segmental
BrRBOH11-GmRBOH13	1.271	0.1554	0.122	Yes	Segmental
BrRBOH13-GmRBOH02	0.7858	0.1983	0.252	Yes	Segmental
BrRBOH13-GmRBOH12	0.757	0.1957	0.258	Yes	Segmental
BrRBOH13-GmRBOH16	0.8977	0.2305	0.256	Yes	Segmental
BrRBOH14-GmRBOH03	1.0022	0.343	0.342	Yes	Segmental
BrRBOH14-GmRBOH05	0.7549	0.2704	0.358	Yes	Segmental
BrRBOH14-GmRBOH09	1.0538	0.3346	0.318	Yes	Segmental
BrRBOH02-CsRBOH03	1.508	0.2648	0.176	Yes	Segmental
BrRBOH06-CsRBOH05	2.5131	0.3109	0.124	Yes	Segmental
BrRBOH09-CsRBOH03	0.7956	0.2337	0.293	Yes	Segmental
BrRBOH11-CsRBOH01	2.7709	0.116	0.042	Yes	Segmental
BrRBOH14-CsRBOH05	2.2057	0.3089	0.14	Yes	Segmental
BrRBOH06-PtRBOH08	1.8659	0.2211	0.118	Yes	Segmental
BrRBOH10-PtRBOH01	0.8202	0.1639	0.199	Yes	Segmental
BrRBOH10-PtRBOH04	0.841	0.1833	0.217	Yes	Segmental
BrRBOH11-PtRBOH02	1.9664	0.1442	0.073	Yes	Segmental
BrRBOH11-PtRBOH03	2.0657	0.1393	0.067	Yes	Segmental
OsRBOH03-BdRBOH05	0.39526	0.06528	0.165	Yes	Segmental
OsRBOH05-BdRBOH02	0.45304	0.04514	0.1	Yes	Segmental
OsRBOH06-BdRBOH06	0.4659	0.09389	0.202	Yes	Segmental
OsRBOH08-BdRBOH08	0.45137	0.08663	0.192	Yes	Segmental
OsRBOH09-BdRBOH07	0.67122	0.11531	0.172	Yes	Segmental
PtRBOH05-CsRBOH06	1.31392	0.09284	0.071	Yes	Segmental
ZmRBOH06-SbRBOH05	0.17367	0.01844	0.085	Yes	Segmental
ZmRBOH07-SbRBOH04	0.08341	0.00677	0.081	Yes	Segmental
ZmRBOH09-SbRBOH02	0.16088	0.02121	0.132	Yes	Segmental
ZmRBOH10-SbRBOH06	0.30662	0.04727	0.154	Yes	Segmental
ZmRBOH11-SbRBOH09	0.14342	0.00818	0.057	Yes	Segmental
ZmRBOH12-SbRBOH01	0.12463	0.03365	0.27	Yes	Segmental
ZmRBOH15-SbRBOH08	0.17894	0.03225	0.18	Yes	Segmental
