# Supplementary material for: Evolutionary and functional analysis of the plant-specific NADPH oxidase gene family in Brassica rapa L
Source: R Soc Open Sci. 2019 Feb 27;6(2):181727. doi: 10.1098/rsos.181727 (PMC6408365; doi:10.1098/rsos.181727)
Supplement: Table S3 [file rsos181727supp8.xlsx]

## Sheet: Sheet1
Table S3. qRT-PCR primers used to detect the expression of RBOH genes in A. thaliana and B. rapa.
Gene ID	Primer sequence
	Forward sequence (5’-3’)	Reverse sequence (5’-3’)
AtRBOH01	ATGCGGGAGGAAGAAATG	TCTGAACCAGTGGCTTTG
AtRBOH02	ATGAAGTTATCGCCTCTG	GGAGATGATATTAACTCAACAC
AtRBOH03	ATGAAACCGTTCTCAAAGA	AAGTTGATGCACTTCCGA
AtRBOH04	AAGGTTGGGACCGAAGATT	CACAGAACTATCGCCTTTTGG
AtRBOH05	ATGTCAATGTCATTTTCCG	CTTTGGGTGAATTCTCCG
AtRBOH06	GCAGAGAGTGAGCTTTGAAGTA	GGCAAAGATCCGCTCAGTAT
AtRBOH07	ATGATGAATCGAAGTGAAATG	CGACTCTCCTCTGTTGTA
AtRBOH08	AATGAGACGAGGCAATTCAAGTA	GTGTCCGAGTTGGTGTCC
AtRBOH09	GAGTTTTGAAGTGTCAGGAG	TAATTGACCACCGCTCAT
AtRBOH10	CCTACGGAGGATTCAACA	TTCTTTTGAGGAGCTTTCAC
BrRBOH01	GTTCATCAGCATGACCGA	CACATCCAGCAGTAATTC
BrRBOH02	AGCTTACGGTTCCTTG	TAGCTCGGTTGCGTGTG
BrRBOH03	CGTGCTACTGAACATCGAC	GATCATGGCTCGAGTCAGC
BrRBOH04	GAGGACCTCAGAATCTTG	GACCTTTAAGAGCGTGTA
BrRBOH05	AGGATCCTGAGAAGTCAC	GATATTTGAAGGCATAAGA
BrRBOH06	GAGCGGTCCGATGAGCGGT	GACGCTTCACCACAGACG
BrRBOH07	TCAGGAATGGATCTCGTAG	TCTCTCTGCCAGAGCCGAT
BrRBOH08	CGGAGATGGTTACGACGAC	AGGCGTCGTGGATAGACTC
BrRBOH09	AATCTCGGTGTGGGATC	TCAAGGAACCGACAGAC
BrRBOH10	CTACGAGGAGCCCACTCAG	GACCTTTGAGAGCCGTGGAC
BrRBOH11	CGGAAGTGCATCCACCTC	ACGAGACCACGAGAACCGGT
BrRBOH12	TGTCAGAGGCGGCGTCTGT	CAACCGCAACCGCAGCTG
BrRBOH13	ACGTAGAGATTACGCTCG	CTAAGAGCAAACATAG
BrRBOH14	ACAGAGAAGCCCTACAGCG	GCATGACGTACGCGTTTCA
